# Supplementary material for: The Membrane Proteome of Spores and Vegetative Cells of the Food-Borne Pathogen Bacillus cereus
Source: MDPI journal article supplement (doi:10.3390/ijms222212475), 2021-11-19
Supplement: s1 [file s1]

## The membrane proteome of spores and vegetative cells of the food-borne pathogen *Bacillus cereus*.

Xiaowei Gao<sup>1,2</sup>, Bhagyashree N. Swarge<sup>1,2</sup>, Henk L. Dekker<sup>2</sup>, Winfried Roseboom<sup>2</sup>, Stanley Brul<sup>1,\*</sup> and Gertjan Kramer<sup>2,\*</sup>

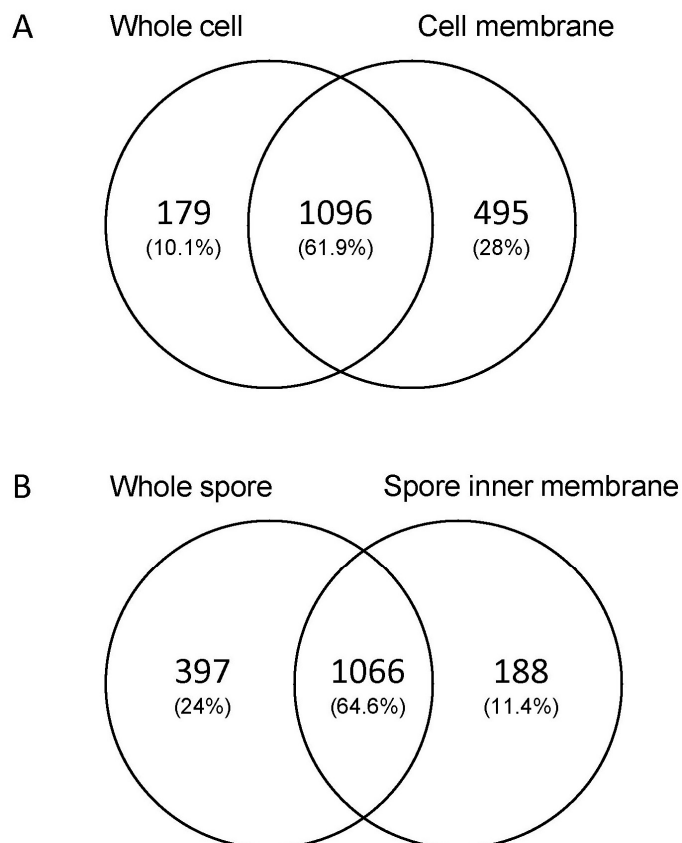

Figure S1. Venn diagrams of proteins identified in the whole cell or spore and membrane fractions. The numbers and corresponding percentages are summarized. (A) Proteins identified in Whole cell using “One-pot” method and enriched cell membrane fractions. (B) Proteins identified in Whole spore using “One-pot” method and enriched spore inner membrane fractions.
